# Supplementary material for: Farmer vs. Industrial Practices: Impact of Variety, Cropping System and Process on the Quality of Durum Wheat Grains and Final Products
Source: MDPI journal article supplement (doi:10.3390/foods12051093), 2023-03-03
Supplement: s1 [file s1]

## Supplementary data

**Table S1.** Protein composition measured on lab-milled grain using SE-HPLC analysis: protein fractions from F1 to F5 (as a percentage of the total protein content), Fi (SDS-unextractable polymeric proteins as a percentage of the total protein content), UPP% ( $100 \times \text{Fi}/(\text{F1} + \text{F2} + \text{Fi})$ ) and the gliadin/glutenin ratio ( $\text{F4}/\text{F1} + \text{F2} + \text{Fi}$ ) and total protein content (% db). Values are the mean of replicates.

| Variety       | Group | Cropping System | Location | Year of harvest | SE-HPLC protein fraction (% of total protein content) |                 |                 |                 |                 |                | UPP (%)         | Glia/Glu       | Total protein content (% db) |
|---------------|-------|-----------------|----------|-----------------|-------------------------------------------------------|-----------------|-----------------|-----------------|-----------------|----------------|-----------------|----------------|------------------------------|
|               |       |                 |          |                 | F1                                                    | F2              | F3              | F4              | F5              | Fi             |                 |                |                              |
| Anvergur      | IND   | ZI              | Mauguio  | 2016            | 7.0 a                                                 | 22.6 bcde*      | 13.1 a          | 28.3 cdef       | 22.5 a          | 6.4 cde        | 17.8 bc         | 0.78 g         | 7.4 de                       |
| Bidi17        | FAR   | ZI              | Mauguio  | 2016            | 7.4 a                                                 | 23.3 abcd       | 11.9 a          | 29.6 abc        | 22.5 a          | 5.3 defg       | 14.7 cde        | 0.82 e         | 8.8 bc                       |
| Bidi17_2      | FAR   | ZI              | Mauguio  | 2016            | 7.9 a                                                 | 23.6 abc        | 11.3 a          | 30.7 ab         | 22.7 a          | 3.7 hi         | 10.6 f          | 0.87 c         | 9.3 ab                       |
| Claudio       | IND   | ZI              | Mauguio  | 2016            | 6.2 a                                                 | 20.6 fg         | 12.3 a          | 29.8 abc        | 22.7 a          | 8.5 a          | 24.0 a          | 0.84 d         | 7.3 e                        |
| Clovis        | DIV   | ZI              | Mauguio  | 2016            | 7.9 a                                                 | 22.6 bcde       | 11.9 a          | 27.6 ef         | 23.3 a          | 6.7 bcd        | 18.0 bc         | 0.74 h         | 7.5 de                       |
| Desire        | DIV   | ZI              | Mauguio  | 2016            | 7.5 a                                                 | 21.7 def        | 12.5 a          | 29.7 abc        | 22.7 a          | 5.8 cdef       | 16.5 c          | 0.85 d         | 7.4 de                       |
| Fabulis       | IND   | ZI              | Mauguio  | 2016            | 7.4 a                                                 | 24.0 abc        | 12.3 a          | 28.5 cde        | 22.3 a          | 5.4 defg       | 14.8 cde        | 0.77 g         | 8.8 bc                       |
| Joyau         | IND   | ZI              | Mauguio  | 2016            | 8.0 a                                                 | 22.4 cde        | 12.1 a          | 28.0 def        | 21.5 a          | 7.9 ab         | 20.6 b          | 0.73 i         | 7.6 de                       |
| Karur         | IND   | ZI              | Mauguio  | 2016            | 7.1 a                                                 | 23.5 abcd       | 12.1 a          | 28.7 cde        | 21.9 a          | 6.6 cd         | 17.8 bc         | 0.77 g         | 7.3 de                       |
| LA1823        | FAR   | ZI              | Mauguio  | 2016            | 7.2 a                                                 | 24.2 ab         | 12.5 a          | 30.3 ab         | 21.4 a          | 4.3 fghi       | 12.0 def        | 0.85 d         | 8.9 abc                      |
| Meliani1B     | DIV   | ZI              | Mauguio  | 2016            | 6.4 a                                                 | 21.3 efg        | 12.9 a          | 30.3 ab         | 23.6 a          | 5.4 defg       | 16.4 c          | 0.91 b         | 7.8 de                       |
| Miradoux      | IND   | ZI              | Mauguio  | 2016            | 6.6 a                                                 | 23.2 abcd       | 14.0 a          | 28.0 def        | 23.2 a          | 4.9 efgh       | 14.2 cde        | 0.81 f         | 7.2 e                        |
| Oued Zenati   | FAR   | ZI              | Mauguio  | 2016            | 6.8 a                                                 | 23.3 abcd       | 12.1 a          | 31.2 a          | 23.2 a          | 3.3 i          | 9.9 f           | 0.93 a         | 9.1 abc                      |
| Pescadou      | IND   | ZI              | Mauguio  | 2016            | 7.4 a                                                 | 24.5 a          | 12.1 a          | 28.3 cdef       | 22.0 a          | 5.7 cdef       | 15.3 cd         | 0.75 h         | 8.2 cd                       |
| Qualidou      | IND   | ZI              | Mauguio  | 2016            | 7.4 a                                                 | 24.1 abc        | 12.9 a          | 29.5 bcd        | 22.0 a          | 4.1 ghi        | 11.4 ef         | 0.83 de        | 7.5 de                       |
| RG1110        | DIV   | ZI              | Mauguio  | 2016            | 8.6 a                                                 | 22.3 cde        | 11.6 a          | 30.6 ab         | 22.6 a          | 4.3 fghi       | 12.1 def        | 0.87 c         | 8.7 bc                       |
| RG218         | DIV   | ZI              | Mauguio  | 2016            | 6.9 a                                                 | 20.1 g          | 13.2 a          | 30.5 ab         | 22.2 a          | 7.0 bc         | 20.7 b          | 0.90 b         | 9.7 a                        |
| RG69649       | DIV   | ZI              | Mauguio  | 2016            | 7.4 a                                                 | 22.7 bcde       | 12.4 a          | 31.0 ab         | 23.1 a          | 3.4 i          | 10.4 f          | 0.93 b         | 9.7 a                        |
| Vivit         | DIV   | ZI              | Mauguio  | 2016            | 7.3 a                                                 | 22.4 cde        | 13.0 a          | 27.0 f          | 24.0 a          | 6.4 cde        | 17.7 bc         | 0.75 h         | 7.4 de                       |
| mean          | DIV   | ZI              | Mauguio  | 2016            | 7.4 a                                                 | 22.0 c          | 12.5 a          | 29.5 b          | 23.1 a          | 5.6 b          | 16.0 a          | 0.85 a         | 8.3 b                        |
| mean          | FAR   | ZI              | Mauguio  | 2016            | 7.3 a                                                 | 23.6 a          | 12.0 a          | 30.5 a          | 22.4 ab         | 4.2 c          | 11.8 b          | 0.87 a         | 9.0 a                        |
| mean          | IND   | ZI              | Mauguio  | 2016            | 7.1 a                                                 | 23.1 b          | 12.6 a          | 28.6 c          | 22.3 b          | 6.2 a          | 17.0 a          | 0.79 b         | 7.7 c                        |
| Mean $\pm$ SD | all   | ZI              | Mauguio  | 2016            | 7.3 $\pm$ 0.58                                        | 22.8 $\pm$ 1.19 | 12.4 $\pm$ 0.64 | 29.4 $\pm$ 1.27 | 22.6 $\pm$ 0.69 | 5.5 $\pm$ 1.47 | 15.5 $\pm$ 3.90 | 0.8 $\pm$ 0.06 | 8.2 $\pm$ 0.89               |
| CV%           |       |                 |          |                 | 8.0%                                                  | 5.2%            | 5.1%            | 4.3%            | 3.0%            | 26.5%          | 25.1%           | 7.8%           | 10.8%                        |
| Anvergur      | IND   | all             | Mauguio  | 2017            | 7.0 bcde                                              | 18.4 fgh        | 9.3 b           | 35.7 defghi     | 17.7 cd         | 11.8 a         | 31.8 bc         | 0.96 def       | 10.0 gh                      |
| Bidi17        | FAR   | all             | Mauguio  | 2017            | 7.0 bcde                                              | 18.9 defg       | 9.3 b           | 37.9 c          | 17.2 d          | 9.7 cd         | 27.1 fgh        | 1.06 c         | 11.9 c                       |
| Bidi17_2      | FAR   | all             | Mauguio  | 2017            | 7.9 ab                                                | 19.5 bc         | 9.1 b           | 36.4 cdefg      | 18.2 bcd        | 8.9 d          | 24.5 h          | 1.00 cdef      | 11.7 c                       |
| Claudio       | IND   | all             | Mauguio  | 2017            | 5.8 e                                                 | 16.3 j          | 8.6 b           | 39.2 b          | 18.1 bcd        | 11.8 a         | 34.6 a          | 1.16 b         | 10.0 gh                      |
| Clovis        | DIV   | all             | Mauguio  | 2017            | 7.4 abcd                                              | 19.7 ab         | 9.2 b           | 34.0 i          | 18.0 bcd        | 11.6 ab        | 30.0 cde        | 0.88 gh        | 9.7 h                        |
| Desire        | DIV   | all             | Mauguio  | 2017            | 6.8 bcde                                              | 18.3 gh         | 9.1 b           | 37.0 cde        | 18.4 bcd        | 10.4 bc        | 29.1 defg       | 1.04 cd        | 10.4 ef                      |
| Fabulis       | IND   | all             | Mauguio  | 2017            | 6.5 bcde                                              | 19.4 bcd        | 9.5 b           | 34.3 hi         | 19.9 a          | 10.4 bc        | 28.8 defg       | 0.95 efg       | 9.7 h                        |
| Joyau         | IND   | all             | Mauguio  | 2017            | 6.5 bcde                                              | 19.0 cdef       | 9.6 b           | 35.2 efghi      | 17.8 cd         | 11.9 a         | 31.9 bc         | 0.94 efg       | 10.4 ef                      |
| Karur         | IND   | all             | Mauguio  | 2017            | 6.1 de                                                | 18.8 efg        | 8.3 b           | 35.6 efghi      | 19.0 abc        | 12.1 a         | 32.9 ab         | 0.96 def       | 10.2 fg                      |
| LA1823        | FAR   | all             | Mauguio  | 2017            | 7.7 abc                                               | 20.1 a          | 9.2 b           | 36.8 cdef       | 17.1 d          | 9.0 d          | 24.6 h          | 1.00 cdef      | 10.8 e                       |
| Meliani 1B    | DIV   | all             | Mauguio  | 2017            | 6.2 cde                                               | 17.4 i          | 9.2 b           | 40.6 a          | 17.3 d          | 9.3 cd         | 28.2 defg       | 1.24 a         | 11.3 b                       |
| Miradoux      | IND   | all             | Mauguio  | 2017            | 7.9 ab                                                | 18.9 defg       | 9.1 b           | 35.4 efghi      | 19.1 abc        | 9.7 cd         | 26.6 fgh        | 0.97 def       | 12.3 b                       |
| OuedZenati    | FAR   | all             | Mauguio  | 2017            | 6.7 bcde                                              | 19.7 ab         | 9.3 b           | 37.6 cd         | 17.3 d          | 9.5 cd         | 26.4 gh         | 1.05 cd        | 10.3 fg                      |
| Pescadou      | IND   | all             | Mauguio  | 2017            | 8.6 a                                                 | 20.2 a          | 8.8 b           | 33.9 i          | 17.3 d          | 11.2 ab        | 27.7 efg        | 0.85 h         | 11.2 d                       |
| Qualidou      | IND   | all             | Mauguio  | 2017            | 8.7 a                                                 | 19.8 ab         | 8.4 b           | 36.1 cdefg      | 19.5 ab         | 7.4 e          | 20.6 i          | 1.01 cdef      | 10.3 fg                      |
| RG1110        | DIV   | all             | Mauguio  | 2017            | 6.7 bcde                                              | 18.0 h          | 10.2 b          | 37.5 cd         | 17.2 cd         | 10.3 bc        | 29.5 cdef       | 1.07 c         | 13.0 a                       |
| RG218         | DIV   | all             | Mauguio  | 2017            | 6.5 bcde                                              | 18.5 fg         | 12.7 a          | 35.0 fghi       | 18.1 bcd        | 9.2 cd         | 27.0 fgh        | 1.02 cde       | 13.1 a                       |
| RG69649       | DIV   | all             | Mauguio  | 2017            | 7.7 abc                                               | 19.3 bcde       | 8.2 b           | 36.7 cdefg      | 17.2 d          | 10.9 ab        | 28.8 defg       | 0.97 def       | 12.5 b                       |

|           |     |     |         |      |            |             |             |             |             |             |             |            |             |
|-----------|-----|-----|---------|------|------------|-------------|-------------|-------------|-------------|-------------|-------------|------------|-------------|
| Vivit     | DIV | all | Mauguio | 2017 | 7.2 bcde   | 18.8 efg    | 9.4 b       | 34.8 ghi    | 18.3 bcd    | 11.5 ab     | 30.6 bcd    | 0.93 fg    | 10.8 e      |
| mean      | DIV | all | Mauguio | 2017 | 6.9 a      | 18.6 c      | 9.7 a       | 36.5 b      | 17.8 b      | 10.5 a      | 29.0 a      | 1.02 a     | 11.6 a      |
| mean      | FAR | all | Mauguio | 2017 | 7.3 a      | 19.6 a      | 9.2 b       | 37.2 a      | 17.4 b      | 9.3 b       | 25.6 b      | 1.03 a     | 11.7 a      |
| mean      | IND | all | Mauguio | 2017 | 7.1 a      | 18.8 b      | 9.0 b       | 35.7 c      | 18.6 a      | 10.8 a      | 29.3 a      | 0.98 b     | 10.2 b      |
| all       | all | ZI  | Mauguio | 2017 | 6.9 b      | 18.5 b      | 9.2 a       | 36.1 b      | 18.3 a      | 11.1 a      | 30.3 a      | 0.99 b     | 10.8 b      |
| all       | all | LI  | Mauguio | 2017 | 7.3 a      | 19.3 a      | 9.4 a       | 36.6 a      | 17.8 b      | 9.6 b       | 26.6 b      | 1.01 a     | 11.3 a      |
| Mean ± SD | all | all | Mauguio | 2017 | 7.1 ± 0.87 | 18.9 ± 1.11 | 9.3 ± 0.99  | 36.3 ± 1.90 | 18.1 ± 0.95 | 10.3 ± 1.72 | 28.5 ± 4.27 | 1.0 ± 0.10 | 11.0 ± 1.19 |
| CV%       |     |     |         |      | 12.3%      | 5.9%        | 10.7%       | 5.2%        | 5.3%        | 16.6%       | 15.0%       | 9.7%       | 10.8%       |
| Anvergur  | IND | ZI  | all     | 2019 | 7.0 b      | 20.4 b      | 10.3 a      | 31.6 b      | 20.7 a      | 10.0 b      | 26.7 b      | 0.85 c     | 9.1 b       |
| Bidi17    | FAR | ZI  | all     | 2019 | 7.4 ab     | 20.9 b      | 10.3 a      | 33.8 a      | 20.2 a      | 7.4 c       | 20.5 c      | 0.95 a     | 10.6 a      |
| Claudio   | IND | ZI  | all     | 2019 | 6.0 c      | 18.0 c      | 9.8 b       | 33.5 a      | 20.5 a      | 12.1 a      | 33.6 a      | 0.93 ab    | 9.4 b       |
| LA1823    | FAR | ZI  | all     | 2019 | 7.7 a      | 21.9 a      | 10.3 a      | 33.3 a      | 19.6 a      | 7.1 c       | 19.3 c      | 0.91 b     | 9.9 b       |
| mean      | FAR | ZI  | all     | 2019 | 7.6 a      | 21.3 a      | 10.3 a      | 33.6 a      | 19.9 a      | 7.2 b       | 20.0 b      | 0.93 a     | 10.2 a      |
| mean      | IND | ZI  | all     | 2019 | 6.5 b      | 19.2 b      | 10.0 b      | 32.6 b      | 20.6 a      | 11.1 a      | 30.2 a      | 0.89 b     | 9.3 b       |
| all       | all | ZI  | Mauguio | 2019 | 6.8 b      | 20.0 a      | 10.0 b      | 33.7 a      | 19.8 b      | 9.7 a       | 26.4 a      | 0.92 a     | 10.8 a      |
| all       | all | ZI  | Purpan  | 2019 | 7.3 a      | 20.6 a      | 10.3 a      | 32.6 b      | 20.7 a      | 8.5 a       | 23.3 a      | 0.90 b     | 8.8 b       |
| Mean ± SD | all | ZI  | all     | 2019 | 7.0 ± 0.74 | 20.3 ± 1.60 | 10.2 ± 0.29 | 33.1 ± 1.26 | 20.2 ± 0.90 | 9.2 ± 2.35  | 25.3 ± 6.44 | 0.9 ± 0.05 | 9.8 ± 1.35  |

\*Values followed by the same letter within each column are not significantly different based on Student-Newman-Keuls (SNK) test performed at  $\alpha = 0.05$ .

**Table S2.** Protein composition measured on stone-milled grain (semolina) using SE-HPLC analysis: protein fractions from F1 to F5 (as a percentage of the total protein content), Fi (SDS-unextractable polymeric proteins as a percentage of the total protein content), UPP% ( $100 \times Fi/(F1 + F2 + Fi)$ ) and the gliadin/glutenin ratio ( $Glia/Glu=(F4/(F1 + F2 + Fi))$ ). Total protein content measured by Kjeldahl method (% db). Values are the mean of replicates.

| Cultivar | Group | Cropping System | Year of harvest | SE-HPLC protein fraction (% of total protein content) |                 |                |                 |                 |                 | UPP (%)         | Glia/Glu        | Protein content (% db) (Kjeldhal) |
|----------|-------|-----------------|-----------------|-------------------------------------------------------|-----------------|----------------|-----------------|-----------------|-----------------|-----------------|-----------------|-----------------------------------|
|          |       |                 |                 | F1                                                    | F2              | F3             | F4              | F5              | Fi              |                 |                 |                                   |
| Anvergur | IND   | all             | 2017            | 7.7 b*                                                | 19.7 a          | 9.1 a          | 36.0 b          | 17.0 a          | 10.4 b          | 27.5 b          | 1.0 b           | 11.3 d                            |
| Bidi17   | FAR   | all             | 2017            | 8.0 b                                                 | 19.1 a          | 8.5 b          | 38.2 a          | 16.0 c          | 10.1 b          | 27.2 b          | 1.0 b           | 14.9 a                            |
| Claudio  | IND   | all             | 2017            | 6.0 c                                                 | 16.8 b          | 8.5 b          | 39.2 a          | 16.7 b          | 12.9 a          | 36.1 a          | 1.1 a           | 12.1 c                            |
| LA1823   | FAR   | all             | 2017            | 8.3 a                                                 | 20.3 a          | 8.4 b          | 36.7 b          | 16.7 b          | 9.7 b           | 25.2 b          | 1.0 b           | 12.6 b                            |
| mean     | FAR   | all             | 2017            | 8.2 a                                                 | 19.7 a          | 8.5 b          | 37.5 a          | 16.4 b          | 9.9 b           | 26.2 b          | 0.99 a          | 13.7 a                            |
| mean     | IND   | all             | 2017            | 6.9 b                                                 | 18.3 b          | 8.8 a          | 37.6 a          | 16.8 a          | 11.7 a          | 31.8 a          | 1.03 a          | 11.7 b                            |
| all      | all   | ZI              | 2017            | 7.6 a                                                 | 18.9 a          | 8.6 a          | 37.0 a          | 17.1 a          | 10.8 a          | 29.1 a          | 1.00 a          | 12.5 b                            |
| all      | all   | LI              | 2017            | 7.5 a                                                 | 19.1 a          | 8.7 a          | 38.0 a          | 16.1 b          | 10.7 a          | 28.9 a          | 1.02 a          | 12.9 a                            |
| all      | all   | all             | 2017            | 7.5 $\pm$ 0.96                                        | 19.0 $\pm$ 1.48 | 8.6 $\pm$ 0.44 | 37.5 $\pm$ 1.83 | 16.6 $\pm$ 0.80 | 10.8 $\pm$ 1.57 | 29.0 $\pm$ 4.76 | 1.01 $\pm$ 0.08 | 12.7 $\pm$ 1.48                   |

\*Values followed by the same letter within each column are not significantly different based on Student-Newman-Keuls (SNK) test performed at  $\alpha = 0.05$ . FAR= varieties used by the peasant pasta makers, IND= varieties recommended by the semolina and pasta industry; ZI= zero input, LI=low input.

**Table S3.** Protein composition measured on dry pasta using SE-HPLC analysis: protein fractions from F1 to F5 (as a percentage of the total protein content), DTE-soluble (DTE soluble proteins as a percentage of the total protein content) and unextractable (unextractable proteins remaining after two extraction steps as a percentage of the total protein content).

| Variety  | Group | Cropping system | Process     | Year of harvest | SE-HPLC fractions (% of total protein content) |                    |        |        |        |             |               |
|----------|-------|-----------------|-------------|-----------------|------------------------------------------------|--------------------|--------|--------|--------|-------------|---------------|
|          |       |                 |             |                 | F1                                             | F2                 | F3     | F4     | F5     | DTE-Soluble | Unextractable |
| Anvergur | IND   | All             | All         | 2017            | 1.6 a*                                         | 11.3 <sup>ab</sup> | 8.6 a  | 26.6 b | 12.9 a | 37.8 a      | 1.2 b         |
| Bidi17   | FAR   | All             | All         | 2017            | 1.7 a                                          | 10.9 <sup>ab</sup> | 8.2 a  | 26.7 b | 12.8 a | 34.2 b      | 5.5 a         |
| Claudio  | IND   | All             | All         | 2017            | 1.6 a                                          | 10.6 b             | 8.4 a  | 28.3 a | 13.3 a | 36.2 ab     | 1.7 b         |
| LA1823   | FAR   | All             | All         | 2017            | 1.8 a                                          | 11.8 a             | 8.0 a  | 27.3 a | 13.7 a | 34.9 b      | 2.5 b         |
| Mean     | FAR   | All             | All         | 2017            | 1.7 a                                          | 11.4 a             | 8.1 b  | 27.0 a | 13.2 a | 34.6 a      | 4.0 a         |
| Mean     | IND   | All             | All         | 2017            | 1.6 b                                          | 10.9 a             | 8.5 a  | 27.4 a | 13.1 a | 37.0 b      | 1.5 b         |
| All      | All   | ZI              | All         | 2017            | 1.7 a                                          | 10.8 b             | 8.0 b  | 26.6 b | 13.5 a | 35.9 a      | 3.5 a         |
| All      | All   | LI              | All         | 2017            | 1.7 a                                          | 11.5 a             | 8.6 a  | 27.8 a | 12.8 b | 35.7 a      | 1.9 b         |
| All      | All   | All             | Artisanal_2 | 2017            | 2.7 a                                          | 18.0 a             | 10.3 a | 33.5 a | 15.6 a | 19.3 b      | 0.6 b         |
| All      | All   | All             | Industrial  | 2017            | 0.7 b                                          | 4.3 b              | 6.3 b  | 20.9 b | 10.7 b | 52.2 a      | 4.9 a         |
| All      | All   | All             | All         | 2017            | 1.8 a                                          | 11.9 a             | 8.8 a  | 28.0 a | 13.3 a | 33.7 a      | 2.4 a         |

\* Values followed by the same letter within each column are not significantly different based on Student-Newman-Keuls (SNK) test performed at  $\alpha = 0.05$ . FAR= varieties used by the peasant pasta makers, IND=varieties recommended by the semolina and pasta industry; ZI= zero input, LI=low input.

**Table S4.** Total protein content (% db) and protein composition measured on OCT cooked pasta using SE-HPLC analysis: SDS-soluble (SDS-soluble protein as a percentage of the total protein content), DTE-soluble (DTE soluble proteins as a percentage of the total protein content). Values are mean of replicates.

| Variety  | Group | Cropping System | Process     | Year of harvest | Protein content (% db) | Protein fraction (% total protein content) |             |
|----------|-------|-----------------|-------------|-----------------|------------------------|--------------------------------------------|-------------|
|          |       |                 |             |                 |                        | SDS-soluble                                | DTE-soluble |
| Anvergur | IND   | ZI              | Artisanal_1 | 2016            | 8.5 d                  | 37.9* d                                    | 62.1 b      |
| Bidi17   | FAR   | ZI              | Artisanal_1 | 2016            | 9.0 b                  | 43.8 b                                     | 56.2 d      |
| Claudio  | IND   | ZI              | Artisanal_1 | 2016            | 7.4 g                  | 42.1 bc                                    | 57.9 cd     |
| Fabulis  | IND   | ZI              | Artisanal_1 | 2016            | 8.6 c                  | 42.1 bc                                    | 57.9 cd     |
| Joyau    | IND   | ZI              | Artisanal_1 | 2016            | 8.3 e                  | 35.1 e                                     | 64.9 a      |
| Karur    | IND   | ZI              | Artisanal_1 | 2016            | 7.2 h                  | 34.3 e                                     | 65.7 a      |
| LA1823   | FAR   | ZI              | Artisanal_1 | 2016            | 9.1 a                  | 34.5 e                                     | 65.5 a      |
| Miradoux | IND   | ZI              | Artisanal_1 | 2016            | 7.2 h                  | 44.7 b                                     | 55.3 d      |
| Pescadou | IND   | ZI              | Artisanal_1 | 2016            | 7.9 f                  | 47.9 a                                     | 52.1 e      |
| Qualidou | IND   | ZI              | Artisanal_1 | 2016            | 7.9 f                  | 40.6 c                                     | 59.4 c      |
| mean     | FAR   | ZI              | Artisanal_1 | 2016            | 9.1 a                  | 39.2 b                                     | 60.9 a      |
| mean     | IND   | ZI              | Artisanal_1 | 2016            | 7.9 b                  | 40.6 a                                     | 59.4 b      |
| all      | all   | ZI              | Artisanal_1 | 2016            | 8.1±0.69               | 40.3 ± 4.65                                | 59.7 ± 4.65 |

\* Values followed by the same letter within each column are not significantly different based on Student-Newman-Keuls (SNK) test performed at  $\alpha = 0.05$ .

**Table S5.** Total protein content measured by Kjeldahl method (% db). Protein composition measured on OCT cooked pasta using SE-HPLC analysis: SDS-soluble (SDS-soluble protein as a percentage of the total protein content), DTE-soluble (DTE soluble proteins as a percentage of the total protein content) and unextractable (unextractable proteins remaining after two extraction steps as a percentage of the total protein content). In vitro digested protein (% of the total protein content). Not determined: nd. Values are mean of duplicates.

| Variety  | Group | Year of harvest | Cropping system | Process       | Protein content (% db) | Protein fraction (% total protein content) |                 |             | In vitro digested proteins (%) |
|----------|-------|-----------------|-----------------|---------------|------------------------|--------------------------------------------|-----------------|-------------|--------------------------------|
|          |       |                 |                 |               |                        | SDS-soluble (%)                            | DTE-soluble (%) | Unextr. (%) |                                |
| Anvergur | IND   | 2016            | ZI              | Artisanal_1   | 8.5                    | 37.9                                       | 62.1            | 0           | nd                             |
| Bidi17   | FAR   | 2016            | ZI              | Artisanal_1   | 9.0                    | 43.8                                       | 56.2            | 0           | nd                             |
| Claudio  | IND   | 2016            | ZI              | Artisanal_1   | 7.4                    | 42.1                                       | 57.9            | 0           | nd                             |
| LA1823   | FAR   | 2016            | ZI              | Artisanal_1   | 9.1                    | 34.5                                       | 65.5            | 0           | nd                             |
| Anvergur | IND   | 2017            | All             | Artisanal_2   | 12.5                   | 32.9                                       | 60.3            | 6.8         | 31.5                           |
| Anvergur | IND   | 2017            | All             | Industrial    | 11.9                   | 20.2                                       | 71.0            | 8.9         | 27.5                           |
| Bidi17   | FAR   | 2017            | All             | Artisanal_2   | 15.0                   | 31.2                                       | 60.5            | 8.4         | 38.0                           |
| Bidi17   | FAR   | 2017            | All             | Industrial    | 14.4                   | 20.2                                       | 67.3            | 12.5        | 30.5                           |
| Claudio  | IND   | 2017            | All             | Artisanal_2   | 14.0                   | 27.2                                       | 54.6            | 18.3        | 39.5                           |
| Claudio  | IND   | 2017            | All             | Industrial    | 12.2                   | 20.1                                       | 68.5            | 11.4        | 26.5                           |
| LA1823   | FAR   | 2017            | All             | Artisanal_2   | 13.0                   | 29.5                                       | 65.5            | 5.0         | 35.5                           |
| LA1824   | FAR   | 2017            | All             | Industrial    | 12.6                   | 19.3                                       | 71.9            | 8.7         | 29.7                           |
| All      | All   | 2017            | ZI              | All           | 12.9 a*                | 24.5 a                                     | 64.4 a          | 11.1 a      | 32.1 a                         |
| All      | All   | 2017            | LI              | All           | 13.4 a                 | 25.6 a                                     | 65.5 a          | 8.9 a       | 32.6 a                         |
| All      | All   | 2017            | All             | Artisanal_2   | 13.7 a                 | 30.2 a                                     | 60.2 b          | 9.6 a       | 36.2 b                         |
| All      | All   | 2017            | All             | Industrial    | 12.6 b                 | 19.9 b                                     | 69.7 a          | 10.4 a      | 28.6 a                         |
| Anvergur | IND   | All             | All             | All           | 11.4 b                 | 28.1 a                                     | 65.6 ab         | 6.3 b       | -                              |
| Bidi17   | FAR   | All             | All             | All           | 13.7 a                 | 29.0 a                                     | 62.6 bc         | 8.4 ab      | -                              |
| Claudio  | IND   | All             | All             | All           | 12.1 b                 | 26.8 a                                     | 61.3 c          | 11.8 a      | -                              |
| LA1823   | FAR   | All             | All             | All           | 12.2 b                 | 26.2 a                                     | 68.3 a          | 5.5 b       | -                              |
| All      | FAR   | All             | All             | All           | 12.9 a                 | 27.6 a                                     | 65.5 a          | 6.9 a       | -                              |
| All      | IND   | All             | All             | All           | 11.7 b                 | 27.5 a                                     | 63.5 a          | 9.1 a       | -                              |
| All      | All   | All             | All             | Artisanal_1_2 | 11.9                   | 33.3                                       | 60.3            | 6.4         | -                              |

\*Values followed by the same letter within each column are not significantly different based on Student-Newman-Keuls (SNK) test performed at  $\alpha = 0.05$ ; (-) data not available
